# Supplementary material
Source: HighWire-hosted journal article supplement (https://cmaj.ca/highwire/filestream/71443/field_highwire_adjunct_files/0/180776-five-1-at.pdf)
Supplement: 180776-five-1-at.pdf [file 180776-five-1-at.pdf]

**Appendix 1 (as supplied by the authors): Resources for training/education on buprenorphine/naloxone**

1. Suboxone Training Program ([www.suboxonetrainingprogram.ca](http://www.suboxonetrainingprogram.ca))
2. British Columbia Centre on Substance Use Provincial Opioid Addiction Treatment Support Program (<http://www.bccsu.ca/provincial-opioid-addiction-treatment-support-program/>) and Online Addiction Medicine Diploma (<http://www.bccsu.ca/about-the-online-addiction-medicine-diploma>)
3. The Centre for Addiction and Mental Health Opioid Dependence Treatment Core Course ([http://www.camh.ca/en/education/about/AZCourses/Pages/Opioid-Dependence-Treatment-\(ODT\)-Core-Course-General-Information.aspx](http://www.camh.ca/en/education/about/AZCourses/Pages/Opioid-Dependence-Treatment-(ODT)-Core-Course-General-Information.aspx))
4. META:PHI Provider Education Presentations and E-Modules (<http://www.metaphi.ca/provider-education.html>)
